# Supplementary material for: Low surface free energy cyanate ester–silica hybrid (CE–SiO2) nanomaterials for low k dielectric applications
Source: Royal Society of Chemistry journal article supplement (doi:10.1039/c3ra41144c), 2013-01-01
Supplement: c3ra41144c.pdf [file c3ra41144c.pdf]

## Low surface free energy cyanate ester - silica hybrid (CE-SiO<sub>2</sub>) nanomaterials for low k dielectric application

S. Devaraju<sup>a,d</sup>, M.R. Vengatesan<sup>a,e</sup>, M. Selvi<sup>a</sup>, A. Ashok Kumar<sup>b</sup>, I. Hamerton<sup>c</sup> and M. Alagar<sup>a\*</sup>

<sup>a\*</sup>Polymer Composites Lab, Department of Chemical Engineering, A.C.Tech, Anna University, Chennai - 600 025, India.

<sup>b</sup>Department of Chemistry, A.P.A College of Arts and Culture, Palani – 624 601, India.

<sup>c</sup>Department of Chemistry, Faculty of Engineering and Physical Sciences, University of Surrey, Guildford, Surrey, GU2 7XH, UK

<sup>d</sup>Next MEMS lab, School of Mechanical Engineering, Pusan National University, Busan 609-735, South Korea.

<sup>e</sup>School of Electronic & Electrical Engineering, Sungkyunkwan University, Suwon, South Korea.

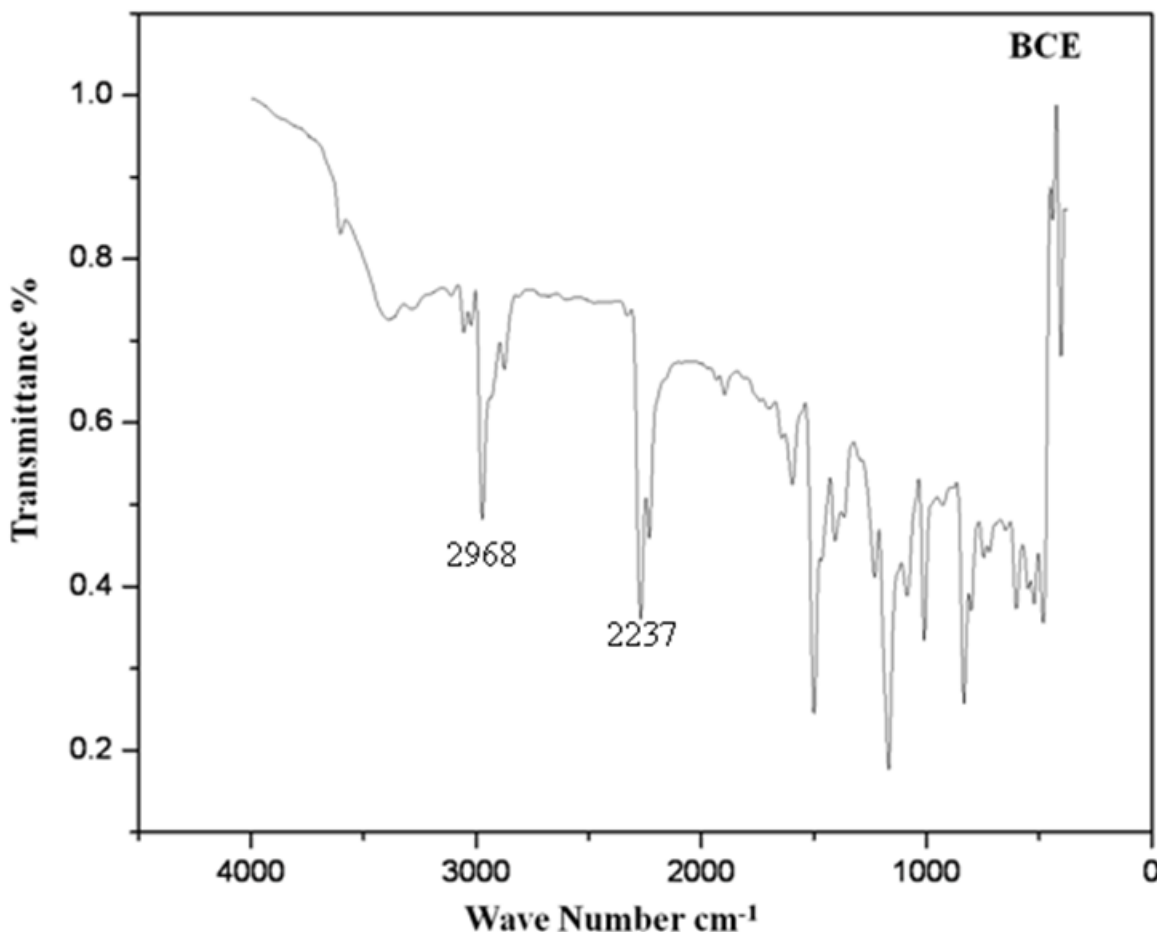

Figure S1: FT-IR Spectrum of 1,4-bis(2-(4-cyanatophenyl)propan-2-yl)benzene

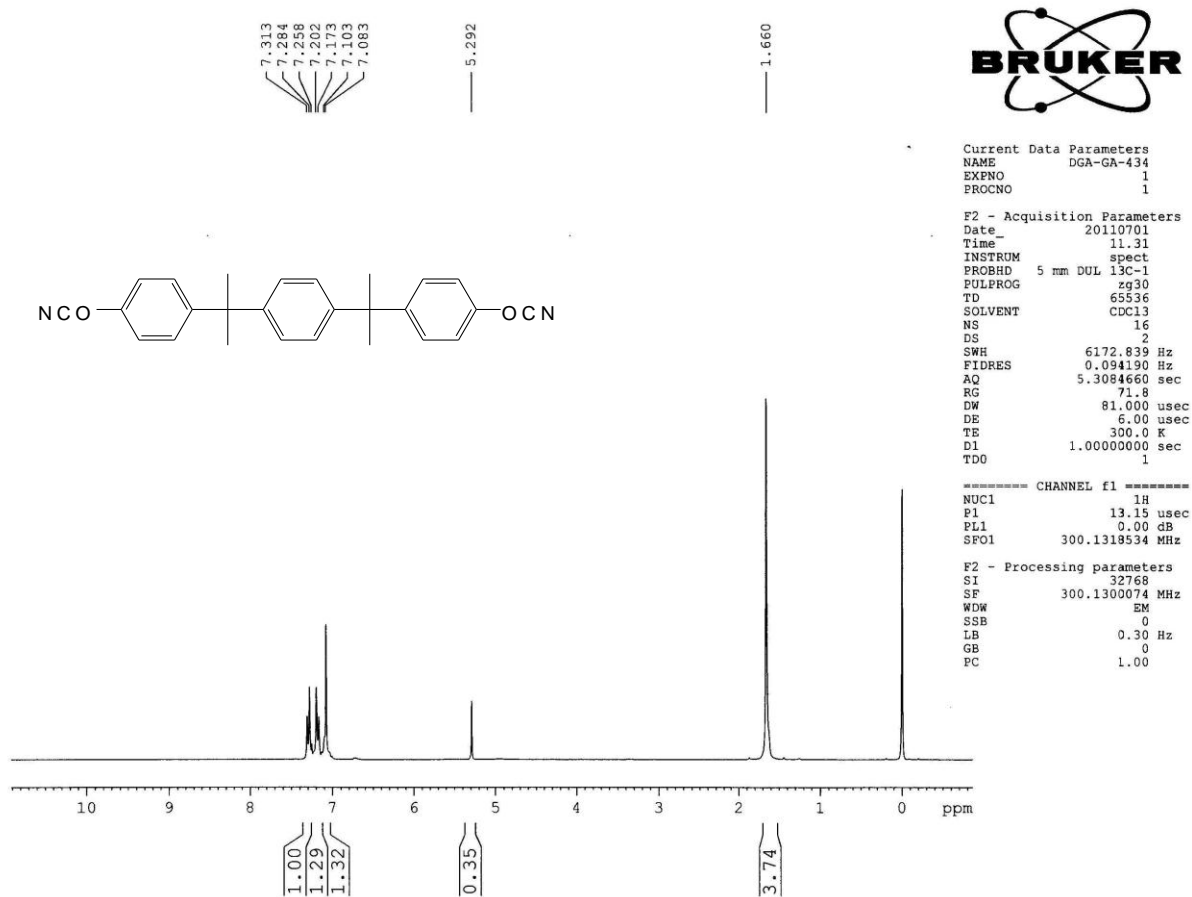

Figure S2: <sup>1</sup>H NMR Spectrum of 1,4-bis(2-(4-cyanatophenyl)propan-2-yl)benzene

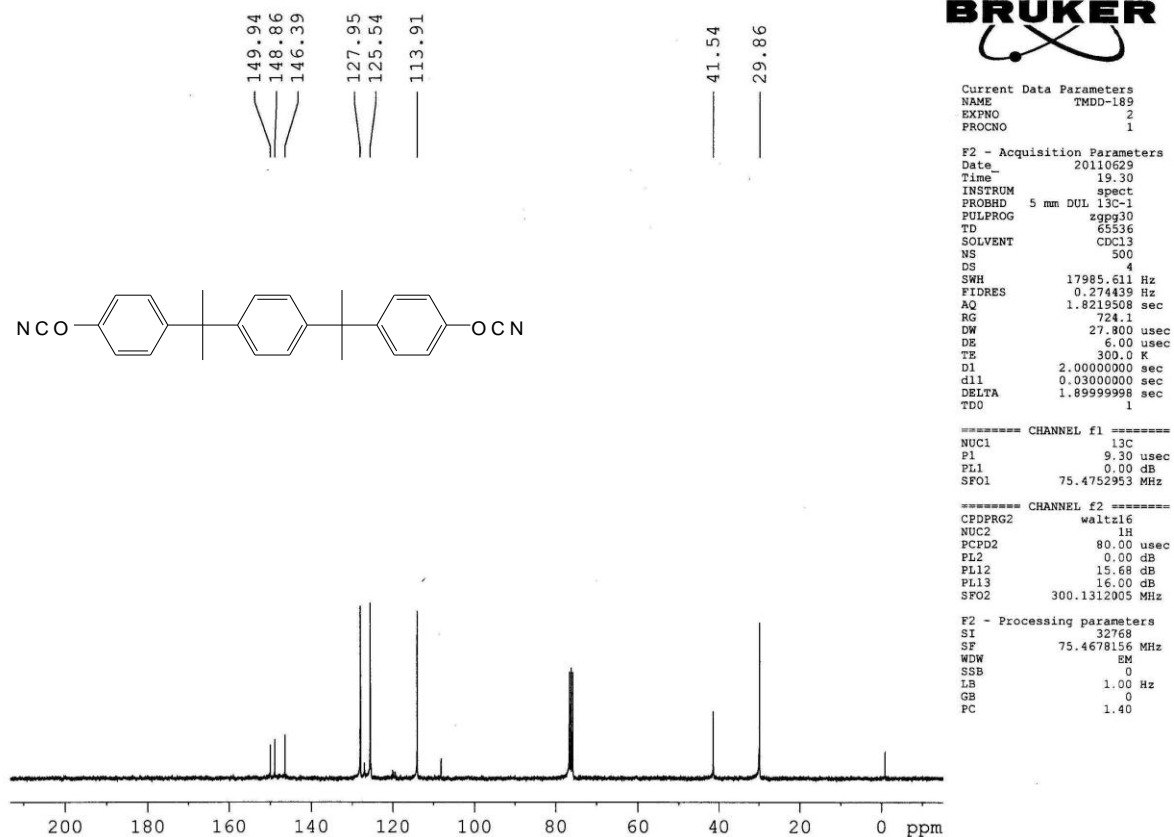

Figure S3:  $^{13}\text{C}$ NMR Spectrum of 1,4-bis(2-(4-cyanatophenyl)propan-2-yl)benzene

**Table S1: Curing time cycle of Neat CE and CE-SiO<sub>2</sub> hybrid nanocomposites**

| Description | BCE (mg) | APTE S (mg) | GPTMS (mg) | TEOS (mg) | Ratio (BCE:*C A:TEOS) | 1,4-Dioxane (ml) | 0.1M HCl <sub>aq</sub> (μl) | Curing cycle Temp (°C) / min         | Appearance  |
|-------------|----------|-------------|------------|-----------|-----------------------|------------------|-----------------------------|--------------------------------------|-------------|
| Neat CE     | 200      | 0           | 0          | 0         | -                     | 4                | 0                           | 120+180 <sup>0</sup> C / 120+120 min | Transparent |
| BACE1       | 200      | 45          | 0          | 200       | 1:0.5:1               | 4                | 83                          | 120+180 <sup>0</sup> C / 120+120 min | Transparent |
| BACE2       | 200      | 90          | 0          | 200       | 1:1:1                 | 4                | 96                          | 120+180 <sup>0</sup> C / 120+120 min | Transparent |
| BACE3       | 200      | 135         | 0          | 200       | 1:1.5:1               | 4                | 110                         | 120+180 <sup>0</sup> C / 120+120 min | Translucent |
| BACE4       | 200      | 180         | 0          | 200       | 1:2:1                 | 4                | 123                         | 120+180 <sup>0</sup> C / 120+120 min | Translucent |
| BGCE1       | 200      | 0           | 60         | 200       | 1:0.5:1               | 4                | 83                          | 120+180 <sup>0</sup> C / 120+120 min | Transparent |
| BGCE2       | 200      | 0           | 119        | 200       | 1:1:1                 | 4                | 96                          | 120+180 <sup>0</sup> C / 120+120 min | Transparent |
| BGCE3       | 200      | 0           | 179        | 200       | 1:1.5:1               | 4                | 110                         | 120+180 <sup>0</sup> C / 120+120 min | Translucent |
| BGCE4       | 200      | 0           | 238        | 200       | 1:2:1                 | 4                | 123                         | 120+180 <sup>0</sup> C / 120+120 min | Translucent |
